# Supplementary material for: Evidence-Based Practice Among Italian Physiotherapists: A National Cross- Sectional Survey on Competencies and Contextual Determinants
Source: Research Square preprint supplement (doi:10.21203/rs.3.rs-8106667/v1), 2025-12-30
Supplement: Supplementary file 1 [file 8b4f0bf6de70441247592777.docx]

**Table 1.** STROBE Statement—Checklist of items that should be included in reports of ***cross-sectional studies***

|  | Item No | Recommendation | Page |
| --- | --- | --- | --- |
| **Title and abstract** | 1 | (*a*) Indicate the study’s design with a commonly used term in the title or the abstract | 1 |
| (*b*) Provide in the abstract an informative and balanced summary of what was done and what was found | 2-3 |
| Introduction | | |  |
| Background/rationale | 2 | Explain the scientific background and rationale for the investigation being reported | 4-5 |
| Objectives | 3 | State specific objectives, including any prespecified hypotheses | 5 |
| Methods | | |  |
| Study design | 4 | Present key elements of study design early in the paper | 5-6 |
| Setting | 5 | Describe the setting, locations, and relevant dates, including periods of recruitment, exposure, follow-up, and data collection | 5-6 |
| Participants | 6 | (*a*) Give the eligibility criteria, and the sources and methods of selection of participants | 6 |
| Variables | 7 | Clearly define all outcomes, exposures, predictors, potential confounders, and effect modifiers. Give diagnostic criteria, if applicable | 6-7 |
| Data sources/ measurement | 8* | For each variable of interest, give sources of data and details of methods of assessment (measurement). Describe comparability of assessment methods if there is more than one group | *6-7* |
| Bias | 9 | Describe any efforts to address potential sources of bias | NA |
| Study size | 10 | Explain how the study size was arrived at | 6 |
| Quantitative variables | 11 | Explain how quantitative variables were handled in the analyses. If applicable, describe which groupings were chosen and why | 7-8 |
| Statistical methods | 12 | (*a*) Describe all statistical methods, including those used to control for confounding | 7-8 |
| (*b*) Describe any methods used to examine subgroups and interactions | 7-8 |
| (*c*) Explain how missing data were addressed | 7-8 |
| (*d*) If applicable, describe analytical methods taking account of sampling strategy | 7-8 |
| (*e*) Describe any sensitivity analyses | 7-8 |
| Results | | |  |
| Participants | 13* | (a) Report numbers of individuals at each stage of study—eg numbers potentially eligible, examined for eligibility, confirmed eligible, included in the study, completing follow-up, and analysed | 8-14 |
| (b) Give reasons for non-participation at each stage |  |
| (c) Consider use of a flow diagram |  |
| Descriptive data | 14* | (a) Give characteristics of study participants (eg demographic, clinical, social) and information on exposures and potential confounders | 8-14 |
| (b) Indicate number of participants with missing data for each variable of interest | 8-14 |
| Outcome data | 15* | Report numbers of outcome events or summary measures | 8-14 |
| Main results | 16 | (*a*) Give unadjusted estimates and, if applicable, confounder-adjusted estimates and their precision (eg, 95% confidence interval). Make clear which confounders were adjusted for and why they were included | 8-14 |
| (*b*) Report category boundaries when continuous variables were categorized | 8-14 |
| (*c*) If relevant, consider translating estimates of relative risk into absolute risk for a meaningful time period | 8-14 |
| Other analyses | 17 | Report other analyses done—eg analyses of subgroups and interactions, and sensitivity analyses | 8-14 |
| Discussion | | |  |
| Key results | 18 | Summarise key results with reference to study objectives | 14-17 |
| Limitations | 19 | Discuss limitations of the study, taking into account sources of potential bias or imprecision. Discuss both direction and magnitude of any potential bias | 17 |
| Interpretation | 20 | Give a cautious overall interpretation of results considering objectives, limitations, multiplicity of analyses, results from similar studies, and other relevant evidence | 17-19 |
| Generalisability | 21 | Discuss the generalisability (external validity) of the study results | 14-17 / 18-20 |
| Other information | | |  |
| Funding | 22 | Give the source of funding and the role of the funders for the present study and, if applicable, for the original study on which the present article is based | 20 |

*Give information separately for exposed and unexposed groups.

**Note:** An Explanation and Elaboration article discusses each checklist item and gives methodological background and published examples of transparent reporting. The STROBE checklist is best used in conjunction with this article (freely available on the Web sites of PLoS Medicine at http://www.plosmedicine.org/, Annals of Internal Medicine at http://www.annals.org/, and Epidemiology at http://www.epidem.com/). Information on the STROBE Initiative is available at www.strobe-statement.org.

**Table 2. Independent samples t-test analysis for EBPQ questions (Q.1-24) for Sex, Team size (physioterapists), and Multidisciplinary team.**

| **EBPQ Question** | **Sex** | | **t (287)** | **pValue** | **Team size (physioterapists)** | | **t (287)** | **pValue** | **Multidisciplinary team** | | **t (287)** | **pValue** |
| --- | --- | --- | --- | --- | --- | --- | --- | --- | --- | --- | --- | --- |
| **Male (n=135)** | **Female (n=154)** | **≤6**  **(n=134)** | **>6**  **(n=155)** | **Yes (n=193)** | **No**  **(n=96)** |
| **Q.1** | 3.69 ± 1.85 | 3.46 ± 2.11 | -0.98 | 0.328 | 3.63 ± 2.02 | 3.52 ± 1.97 | 0.47 | 0.639 | 3.55 ± 1.96 | 3.59 ± 2.06 | 0.16 | 0.877 |
| **Q.2** | 4.53 ± 1.76 | 4.04 ± 1.90 | -2.30 | **0.022** | 4.29 ± 1.90 | 4.25 ± 1.80 | 0.18 | 0.857 | 4.36 ± 1.79 | 4.09 ± 1.95 | 1.11 | 0.268 |
| **Q.3** | 4.44 ± 1.76 | 3.94 ± 1.93 | -2.31 | **0.022** | 4.35 ± 1.80 | 4.01 ± 1.92 | 1.54 | 0.124 | 4.15 ± 1.86 | 4.22 ± 1.90 | 0.31 | 0.755 |
| **Q.4** | 5.53 ± 1.55 | 5.11 ± 1.86 | -2.07 | **0.039** | 5.40 ± 1.65 | 5.22 ± 1.81 | 0.90 | 0.367 | 5.33 ± 1.71 | 5.25 ± 1.79 | 0.37 | 0.712 |
| **Q.5** | 4.62 ± 1.80 | 5.03 ± 1.74 | 1.96 | 0.050 | 4.73 ± 1.82 | 4.94 ± 1.74 | 0.97 | 0.332 | 5.08 ± 1.68 | 4.35 ± 1.86 | 3.23 | **0.001** |
| **Q.6** | 4.61 ± 1.85 | 4.56 ± 1.87 | -0.19 | 0.847 | 4.46 ± 1.94 | 4.70 ± 1.79 | 1.10 | 0.274 | 4.90 ± 1.72 | 3.95 ± 1.97 | 4.04 | **<0.001** |
| **Q.7** | 4.25 ± 1.61 | 3.88 ± 1.67 | -1.94 | 0.053 | 4.35 ± 1.61 | 3.79 ± 1.65 | 2.90 | **0.004** | 3.96 ± 1.64 | 4.24 ± 1.67 | 1.36 | 0.177 |
| **Q.8** | 5.43 ± 1.42 | 5.46 ± 1.43 | 0.20 | 0.838 | 5.45 ± 1.52 | 5.45 ± 1.33 | 0.04 | 0.972 | 5.49 ± 1.45 | 5.37 ± 1.37 | 0.68 | 0.499 |
| **Q.9** | 6.08 ± 1.56 | 6.07 ± 1.26 | -0.06 | 0.952 | 6.02 ± 1.44 | 6.12 ± 1.37 | 0.60 | 0.547 | 6.16 ± 1.29 | 5.92 ± 1.61 | 1.27 | 0.207 |
| **Q.10** | 5.64 ± 1.32 | 5.68 ± 1.33 | 0.24 | 0.807 | 5.61 ± 1.39 | 5.70 ± 1.27 | 0.54 | 0.590 | 5.79 ± 1.23 | 5.39 ± 1.47 | 2.34 | **0.020** |
| **Q.11** | 4.34 ± 1.48 | 4.03 ± 1.58 | -1.75 | 0.082 | 4.22 ± 1.50 | 4.13 ± 1.58 | 0.52 | 0.601 | 4.26 ± 1.54 | 4.00 ± 1.54 | 1.35 | 0.180 |
| **Q.12** | 4.95 ± 1.38 | 4.75 ± 1.48 | -1.20 | 0.233 | 4.78 ± 1.45 | 4.89 ± 1.43 | 0.63 | 0.530 | 4.88 ± 1.44 | 4.76 ± 1.44 | 0.67 | 0.504 |
| **Q.13** | 4.80 ± 1.20 | 4.60 ± 1.34 | -1.31 | 0.191 | 4.78 ± 1.29 | 4.62 ± 1.27 | 1.09 | 0.278 | 4.75 ± 1.30 | 4.58 ± 1.25 | 1.07 | 0.288 |
| **Q.14** | 4.66 ± 1.57 | 4.54 ± 1.56 | -0.65 | 0.515 | 4.73 ± 1.57 | 4.48 ± 1.55 | 1.38 | 0.169 | 4.74 ± 1.48 | 4.30 ± 1.69 | 2.17 | **0.032** |
| **Q.15** | 5.13 ± 1.30 | 4.82 ± 1.43 | -1.96 | 0.051 | 5.12 ± 1.29 | 4.83 ± 1.45 | 1.79 | 0.075 | 5.01 ± 1.32 | 4.88 ± 1.49 | 0.75 | 0.451 |
| **Q.16** | 5.26 ± 1.16 | 5.39 ± 1.13 | 0.97 | 0.335 | 5.36 ± 1.13 | 5.30 ± 1.16 | 0.41 | 0.683 | 5.39 ± 1.08 | 5.21 ± 1.26 | 1.20 | 0.231 |
| **Q.17** | 5.11 ± 1.40 | 4.69 ± 1.54 | -2.45 | **0.015** | 5.08 ± 1.42 | 4.72 ± 1.52 | 2.11 | **0.036** | 4.92 ± 1.44 | 4.81 ± 1.58 | 0.57 | 0.567 |
| **Q.18** | 4.56 ± 1.39 | 4.27 ± 1.61 | -1.60 | 0.110 | 4.55 ± 1.44 | 4.28 ± 1.57 | 1.55 | 0.122 | 4.45 ± 1.54 | 4.32 ± 1.46 | 0.66 | 0.510 |
| **Q.19** | 4.70 ± 1.38 | 4.45 ± 1.55 | -1.44 | 0.151 | 4.72 ± 1.41 | 4.43 ± 1.52 | 1.73 | 0.085 | 4.62 ± 1.48 | 4.46 ± 1.47 | 0.86 | 0.391 |
| **Q.20** | 5.01 ± 1.36 | 4.79 ± 1.53 | -1.30 | 0.193 | 4.99 ± 1.40 | 4.80 ± 1.50 | 1.13 | 0.260 | 4.98 ± 1.41 | 4.70 ± 1.52 | 1.54 | 0.125 |
| **Q.21** | 4.96 ± 1.20 | 4.95 ± 1.40 | -0.01 | 0.995 | 5.05 ± 1.31 | 4.87 ± 1.31 | 1.18 | 0.241 | 5.04 ± 1.26 | 4.78 ± 1.39 | 1.55 | 0.123 |
| **Q.22** | 5.24 ± 1.52 | 5.34 ± 1.64 | 0.58 | 0.565 | 5.23 ± 1.57 | 5.35 ± 1.60 | 0.63 | 0.531 | 5.42 ± 1.51 | 5.03 ± 1.70 | 1.92 | 0.056 |
| **Q.23** | 5.00 ± 1.52 | 5.06 ± 1.59 | 0.32 | 0.750 | 4.95 ± 1.62 | 5.10 ± 1.50 | 0.84 | 0.400 | 5.17 ± 1.47 | 4.75 ± 1.68 | 2.09 | **0.038** |
| **Q.24** | 5.11 ± 1.21 | 5.20 ± 1.29 | 0.61 | 0.539 | 5.16 ± 1.24 | 5.16 ± 1.26 | 0.03 | 0.975 | 5.31 ± 1.21 | 4.86 ± 1.28 | 2.81 | **0.005** |

EBPQ = Evidence Based Practice Questionnaire; Q. = question. Data are reported as mean±SD.

**Table 3. One-way ANOVA EBPQ questions (Q.1-24) for age, with Tukey HSD as post-Hoc test.**

| **EBPQ Question** | **Age (years)** | | | | | **F (4, 284)** | **pValue** | **Tukey HSD** |
| --- | --- | --- | --- | --- | --- | --- | --- | --- |
| **20-29 (n=87)** | **30-39 (n=83)** | **40-49 (n=48)** | **50-59 (n=55)** | **>60**  **(n=16)** |
| **Q.1** | 3.98 ± 1.71 | 3.39 ± 2.01 | 3.19 ± 2.25 | 3.55 ± 2.04 | 3.50 ± 2.16 | 1.55 | 0.188 | - |
| **Q.2** | 4.64 ± 1.78 | 4.28 ± 1.67 | 3.90 ± 2.08 | 3.95 ± 1.87 | 4.44 ± 2.06 | 1.87 | 0.117 | - |
| **Q.3** | 4.41 ± 1.68 | 4.12 ± 1.78 | 3.69 ± 2.03 | 4.05 ± 1.92 | 4.94 ± 2.35 | 1.93 | 0.105 | - |
| **Q.4** | 5.51 ± 1.44 | 5.24 ± 1.68 | 5.08 ± 2.05 | 5.11 ± 1.91 | 5.88 ± 1.78 | 1.13 | 0.344 | - |
| **Q.5** | 4.62 ± 1.68 | 4.78 ± 1.68 | 4.85 ± 2.08 | 5.11 ± 1.67 | 5.38 ± 2.09 | 1.03 | 0.391 | - |
| **Q.6** | 4.43 ± 1.80 | 4.59 ± 1.79 | 4.69 ± 2.03 | 4.60 ± 1.82 | 5.06 ± 2.24 | 0.46 | 0.766 | - |
| **Q.7** | 4.14 ± 1.47 | 3.76 ± 1.66 | 3.88 ± 1.77 | 4.33 ± 1.64 | 4.69 ± 1.96 | 1.85 | 0.120 | - |
| **Q.8** | 5.46 ± 1.28 | 5.51 ± 1.42 | 5.46 ± 1.37 | 5.31 ± 1.49 | 5.53 ± 2.17 | 0.18 | 0.949 | - |
| **Q.9** | 6.37 ± 1.41 | 6.16 ± 1.10 | 6.00 ± 1.50 | 5.60 ± 1.66 | 5.94 ± 1.18 | 2.73 | **0.029** | 20-29 vs 50-59 (p = 0.013) |
| **Q.10** | 5.79 ± 1.36 | 5.59 ± 1.33 | 5.65 ± 1.28 | 5.62 ± 1.33 | 5.44 ± 1.36 | 0.40 | 0.808 | - |
| **Q.11** | 4.32 ± 1.33 | 4.17 ± 1.57 | 4.02 ± 1.60 | 3.96 ± 1.77 | 4.56 ± 1.46 | 0.83 | 0.508 | - |
| **Q.12** | 5.00 ± 1.31 | 5.02 ± 1.32 | 5.12 ± 1.41 | 4.24 ± 1.57 | 4.25 ± 1.65 | 4.38 | **0.002** | 20-29 vs 50-59 (p = 0.015); 30-39 vs 50-59 (p = 0.012); 40-49 vs 50-59 (p = 0.013) |
| **Q.13** | 4.57 ± 1.17 | 4.78 ± 1.29 | 4.71 ± 1.44 | 4.67 ± 1.38 | 4.94 ± 1.00 | 0.44 | 0.782 | - |
| **Q.14** | 4.80 ± 1.54 | 4.53 ± 1.52 | 4.56 ± 1.74 | 4.29 ± 1.57 | 4.94 ± 1.24 | 1.15 | 0.335 | - |
| **Q.15** | 5.20 ± 1.29 | 4.88 ± 1.33 | 5.08 ± 1.33 | 4.58 ± 1.58 | 5.12 ± 1.31 | 1.91 | 0.108 | - |
| **Q.16** | 5.33 ± 1.03 | 5.27 ± 1.18 | 5.33 ± 1.15 | 5.45 ± 1.21 | 5.19 ± 1.33 | 0.29 | 0.884 | - |
| **Q.17** | 5.26 ± 1.22 | 4.95 ± 1.46 | 4.73 ± 1.51 | 4.31 ± 1.73 | 4.94 ± 1.39 | 3.81 | 0.005 | 20-29 vs 50-59 (p = 0.002) |
| **Q.18** | 4.51 ± 1.37 | 4.45 ± 1.58 | 4.35 ± 1.62 | 4.13 ± 1.58 | 4.75 ± 1.39 | 0.79 | 0.530 | - |
| **Q.19** | 4.75 ± 1.32 | 4.53 ± 1.46 | 4.29 ± 1.57 | 4.44 ± 1.64 | 5.00 ± 1.41 | 1.21 | 0.307 | - |
| **Q.20** | 5.00 ± 1.22 | 5.01 ± 1.42 | 4.67 ± 1.63 | 4.69 ± 1.68 | 5.00 ± 1.46 | 0.83 | 0.505 | - |
| **Q.21** | 4.87 ± 1.16 | 5.10 ± 1.23 | 4.85 ± 1.56 | 4.91 ± 1.43 | 5.12 ± 1.31 | 0.48 | 0.751 | - |
| **Q.22** | 5.21 ± 1.63 | 5.47 ± 1.38 | 5.23 ± 1.69 | 5.25 ± 1.66 | 5.19 ± 1.83 | 0.37 | 0.833 | - |
| **Q.23** | 4.90 ± 1.55 | 5.07 ± 1.37 | 4.94 ± 1.69 | 5.20 ± 1.65 | 5.25 ± 1.84 | 0.46 | 0.766 | - |
| **Q.24** | 5.07 ± 1.07 | 5.18 ± 1.19 | 5.23 ± 1.45 | 5.25 ± 1.40 | 5.00 ± 1.37 | 0.30 | 0.878 | - |

EBPQ = Evidence Based Practice Questionnaire; Q. = question. Data are reported as mean±SD.

**Table 4. One-way ANOVA EBPQ questions (Q.1-24) for English proficiency, with Tukey HSD as post-Hoc test.**

| **EBPQ Question** | **English proficiency** | | | | **F (3, 285)** | **pValue** | **Tukey HSD** |
| --- | --- | --- | --- | --- | --- | --- | --- |
| **Poor (n=35)** | **Moderate (n=95)** | **Good (n=115)** | **Excellent (n=44)** |
| **Q.1** | 2.66 ± 1.83 | 3.33 ± 2.02 | 3.80 ± 1.89 | 4.20 ± 2.03 | 5.14 | **0.002** | Poor vs Good (p = 0.014); Poor vs Excellent (p = 0.003) |
| **Q.2** | 3.63 ± 1.75 | 3.99 ± 1.87 | 4.38 ± 1.74 | 5.09 ± 1.88 | 5.42 | **0.001** | Poor vs Excellent (p = 0.002); Moderate vs 3 (p = 0.005) |
| **Q.3** | 3.17 ± 1.74 | 3.94 ± 1.97 | 4.43 ± 1.66 | 4.77 ± 1.95 | 6.46 | **<0.001** | Poor vs Good (p = 0.002); Poor vs Excellent (p = 0.001) |
| **Q.4** | 4.34 ± 1.86 | 5.05 ± 1.91 | 5.55 ± 1.52 | 5.98 ± 1.34 | 7.73 | **<0.001** | Poor vs Good (p = 0.001); Poor vs Excellent (p = 0.000); Moderate vs Excellent (p = 0.014) |
| **Q.5** | 4.51 ± 1.77 | 4.61 ± 1.94 | 5.07 ± 1.67 | 5.00 ± 1.63 | 1.69 | 0.169 | - |
| **Q.6** | 4.23 ± 2.00 | 4.44 ± 1.88 | 4.79 ± 1.81 | 4.64 ± 1.81 | 1.10 | 0.350 | - |
| **Q.7** | 3.69 ± 1.73 | 4.00 ± 1.80 | 4.00 ± 1.52 | 4.59 ± 1.50 | 2.24 | 0.084 | - |
| **Q.8** | 4.97 ± 1.58 | 5.44 ± 1.33 | 5.50 ± 1.48 | 5.70 ± 1.27 | 1.85 | 0.138 | - |
| **Q.9** | 5.57 ± 1.50 | 6.00 ± 1.49 | 6.16 ± 1.32 | 6.43 ± 1.26 | 2.72 | **0.045** | Poor vs Excellent (p = 0.034) |
| **Q.10** | 5.29 ± 1.45 | 5.61 ± 1.41 | 5.75 ± 1.21 | 5.82 ± 1.32 | 1.36 | 0.256 | - |
| **Q.11** | 3.06 ± 1.35 | 4.03 ± 1.57 | 4.34 ± 1.40 | 4.93 ± 1.45 | 11.53 | **<0.001** | Poor vs Moderate (p = 0.005); Poor vs Good (p = 0.000); Poor vs Excellent (p = 0.000); Moderate vs Excellent (p = 0.005) |
| **Q.12** | 3.69 ± 1.53 | 4.74 ± 1.47 | 5.10 ± 1.27 | 5.30 ± 1.21 | 11.62 | **<0.001** | Poor vs Moderate (p = 0.001); Poor vs Good (p = 0.000); Poor vs Excellent (p = 0.000) |
| **Q.13** | 4.20 ± 1.43 | 4.54 ± 1.43 | 4.90 ± 1.03 | 4.89 ± 1.28 | 3.69 | **0.012** | Poor vs Good (p = 0.021) |
| **Q.14** | 3.60 ± 1.31 | 4.39 ± 1.68 | 4.80 ± 1.37 | 5.30 ± 1.53 | 9.68 | **<0.001** | Poor vs Moderate (p = 0.040); Poor vs Good (p = 0.000); Poor vs Excellent (p = 0.000); Moderate vs Excellent (p = 0.006) |
| **Q.15** | 3.97 ± 1.50 | 4.67 ± 1.40 | 5.22 ± 1.15 | 5.73 ± 1.17 | 15.19 | **<0.001** | Poor vs Moderate (p = 0.031); Poor vs Good (p = 0.000); Poor vs Excellent (p = 0.000); Moderate vs Good (p = 0.013); Moderate vs Excellent (p = 0.000) |
| **Q.16** | 4.91 ± 1.17 | 5.13 ± 1.34 | 5.52 ± 0.95 | 5.59 ± 0.97 | 4.56 | **0.004** | Poor vs Good (p = 0.027); Poor vs Excellent (p = 0.041) |
| **Q.17** | 3.89 ± 1.43 | 4.60 ± 1.53 | 5.10 ± 1.29 | 5.75 ± 1.31 | 13.82 | **<0.001** | Poor vs Moderate (p = 0.049); Poor vs Good (p = 0.000); Poor vs Excellent (p = 0.000); Moderate vs Excellent (p = 0.000); Good vs Excellent (p = 0.042) |
| **Q.18** | 3.69 ± 1.53 | 4.06 ± 1.54 | 4.64 ± 1.40 | 5.09 ± 1.34 | 8.89 | **<0.001** | Poor vs Good (p = 0.004); Poor vs Excellent (p = 0.000); Moderate vs Good (p = 0.022); Moderate vs Excellent (p = 0.001) |
| **Q.19** | 3.91 ± 1.38 | 4.25 ± 1.59 | 4.78 ± 1.35 | 5.18 ± 1.28 | 7.57 | **<0.001** | Poor vs Good (p = 0.010); Poor vs Excellent (p = 0.001); Moderate vs Good (p = 0.039); Moderate vs Excellent (p = 0.002) |
| **Q.20** | 3.86 ± 1.52 | 4.60 ± 1.54 | 5.16 ± 1.28 | 5.64 ± 0.99 | 13.97 | **<0.001** | Poor vs Moderate (p = 0.032); Poor vs Good (p = 0.000); Poor vs Excellent (p = 0.000); Moderate vs Good (p = 0.018); Moderate vs Excellent (p = 0.000) |
| **Q.21** | 4.26 ± 1.34 | 4.68 ± 1.44 | 5.15 ± 1.15 | 5.59 ± 0.97 | 9.81 | **<0.001** | Poor vs Good (p = 0.002); Poor vs Excellent (p = 0.000); Moderate vs Good (p = 0.040); Moderate vs Excellent (p = 0.001) |
| **Q.22** | 4.74 ± 1.77 | 5.22 ± 1.55 | 5.36 ± 1.52 | 5.73 ± 1.56 | 2.69 | **0.047** | Poor vs Excellent (p = 0.030) |
| **Q.23** | 4.60 ± 1.56 | 4.95 ± 1.44 | 5.14 ± 1.58 | 5.27 ± 1.70 | 1.54 | 0.205 | - |
| **Q.24** | 4.60 ± 1.48 | 5.11 ± 1.40 | 5.33 ± 1.03 | 5.27 ± 1.11 | 3.32 | **0.020** | Poor vs Good (p = 0.013) |

EBPQ = Evidence Based Practice Questionnaire; Q. = question. Data are reported as mean±SD.

**Table 5. One-way ANOVA EBPQ questions (Q.1-24) for Years since bachelor’s degree, with Tukey HSD as post-Hoc test.**

| **EBPQ Question** | **Years since bachelor’s degree** | | | | | | | | | **F (2, 286)** | **pValue** | **Tukey HSD** |
| --- | --- | --- | --- | --- | --- | --- | --- | --- | --- | --- | --- | --- |
| **<5 years (n=80)** | **6–10 years (n=50)** | **11–15 years (n=38)** | **16–20 years (n=35)** | **21–25 years (n=22)** | **26–30 years (n=19)** | **31–35 years (n=24)** | **36–40 years (n=10)** | **>40 years (n=11)** |
| **Q.1** | 3.85 ± 1.78 | 3.36 ± 1.91 | 3.50 ± 2.02 | 3.63 ± 2.24 | 3.32 ± 2.38 | 3.95 ± 2.20 | 2.96 ± 1.78 | 3.60 ± 1.78 | 3.64 ± 2.46 | 0.69 | 0.704 | - |
| **Q.2** | 4.36 ± 1.74 | 4.58 ± 1.80 | 4.21 ± 1.97 | 4.40 ± 1.85 | 4.00 ± 2.07 | 4.21 ± 2.18 | 3.71 ± 1.78 | 4.30 ± 1.16 | 3.82 ± 2.09 | 0.64 | 0.741 | - |
| **Q.3** | 4.21 ± 1.69 | 4.28 ± 1.88 | 4.39 ± 2.03 | 4.06 ± 1.73 | 3.45 ± 1.87 | 4.11 ± 2.31 | 3.83 ± 1.81 | 4.20 ± 1.55 | 5.18 ± 2.40 | 1.02 | 0.423 | - |
| **Q.4** | 5.29 ± 1.53 | 5.36 ± 1.87 | 5.61 ± 1.70 | 5.29 ± 1.60 | 4.91 ± 1.90 | 5.21 ± 1.96 | 4.92 ± 2.02 | 5.80 ± 1.55 | 5.55 ± 2.02 | 0.57 | 0.800 | - |
| **Q.5** | 4.58 ± 1.65 | 4.74 ± 1.75 | 4.89 ± 1.93 | 5.17 ± 1.72 | 4.86 ± 1.78 | 5.05 ± 1.93 | 5.04 ± 1.94 | 5.20 ± 1.48 | 4.82 ± 2.27 | 0.52 | 0.843 | - |
| **Q.6** | 4.08 ± 1.69 | 4.92 ± 2.00 | 4.58 ± 1.75 | 4.89 ± 1.81 | 4.86 ± 2.21 | 4.58 ± 1.74 | 5.04 ± 1.73 | 4.50 ± 1.90 | 4.36 ± 2.34 | 1.35 | 0.220 | - |
| **Q.7** | 4.04 ± 1.44 | 4.08 ± 1.65 | 3.68 ± 1.88 | 3.91 ± 1.67 | 4.00 ± 1.90 | 3.68 ± 1.97 | 4.46 ± 1.35 | 5.10 ± 1.37 | 4.64 ± 1.75 | 1.26 | 0.266 | - |
| **Q.8** | 5.40 ± 1.35 | 5.62 ± 1.29 | 5.24 ± 1.62 | 5.63 ± 0.97 | 5.41 ± 1.84 | 5.58 ± 1.22 | 5.38 ± 1.56 | 5.20 ± 1.55 | 5.40 ± 2.27 | 0.34 | 0.949 | - |
| **Q.9** | 6.39 ± 1.37 | 6.12 ± 1.22 | 6.34 ± 1.10 | 5.94 ± 1.35 | 5.86 ± 1.78 | 5.58 ± 1.43 | 5.42 ± 1.89 | 6.00 ± 0.94 | 5.91 ± 1.30 | 1.80 | 0.078 | - |
| **Q.10** | 5.72 ± 1.39 | 5.66 ± 1.30 | 5.76 ± 1.34 | 5.63 ± 1.06 | 5.50 ± 1.71 | 5.74 ± 1.19 | 5.50 ± 1.41 | 5.80 ± 0.79 | 5.27 ± 1.49 | 0.27 | 0.974 | - |
| **Q.11** | 4.09 ± 1.28 | 4.42 ± 1.67 | 4.26 ± 1.50 | 4.29 ± 1.64 | 3.86 ± 1.78 | 4.16 ± 1.92 | 3.75 ± 1.62 | 4.40 ± 1.35 | 4.36 ± 1.43 | 0.61 | 0.769 | - |
| **Q.12** | 4.97 ± 1.39 | 5.00 ± 1.32 | 5.03 ± 1.30 | 5.20 ± 1.35 | 4.82 ± 1.37 | 4.42 ± 1.71 | 3.88 ± 1.45 | 5.00 ± 1.49 | 4.09 ± 1.76 | 2.57 | **0.010** | <5 years vs 31–35 years (p = 0.025); 6–10 years vs 31–35 years (p = 0.038); 11–15 years vs 31–35 years (p = 0.048); 16–20 years vs 31–35 years (p = 0.013) |
| **Q.13** | 4.40 ± 1.22 | 4.78 ± 1.18 | 5.11 ± 1.20 | 4.80 ± 1.26 | 4.68 ± 1.62 | 4.74 ± 1.56 | 4.75 ± 1.19 | 4.40 ± 1.51 | 4.82 ± 1.08 | 1.17 | 0.317 | - |
| **Q.14** | 4.59 ± 1.53 | 4.76 ± 1.72 | 4.55 ± 1.55 | 4.83 ± 1.54 | 4.45 ± 1.74 | 4.68 ± 1.57 | 4.00 ± 1.35 | 4.50 ± 1.58 | 4.82 ± 1.33 | 0.66 | 0.725 | - |
| **Q.15** | 5.04 ± 1.31 | 5.16 ± 1.43 | 4.89 ± 1.31 | 5.09 ± 1.15 | 5.00 ± 1.66 | 4.89 ± 1.37 | 4.50 ± 1.59 | 4.50 ± 1.58 | 4.91 ± 1.45 | 0.69 | 0.704 | - |
| **Q.16** | 5.26 ± 1.02 | 5.38 ± 1.23 | 5.58 ± 1.20 | 5.14 ± 0.88 | 5.27 ± 1.28 | 5.63 ± 1.26 | 5.42 ± 1.32 | 5.00 ± 0.94 | 5.00 ± 1.48 | 0.79 | 0.608 | - |
| **Q.17** | 5.00 ± 1.28 | 5.26 ± 1.58 | 5.16 ± 1.33 | 4.74 ± 1.42 | 4.73 ± 1.72 | 4.58 ± 1.61 | 4.12 ± 1.70 | 4.50 ± 1.58 | 4.73 ± 1.49 | 1.71 | 0.096 | - |
| **Q.18** | 4.28 ± 1.37 | 4.50 ± 1.61 | 4.82 ± 1.47 | 4.54 ± 1.62 | 4.14 ± 1.58 | 4.37 ± 1.77 | 4.08 ± 1.56 | 4.00 ± 1.25 | 4.73 ± 1.49 | 0.86 | 0.554 | - |
| **Q.19** | 4.62 ± 1.27 | 4.62 ± 1.65 | 4.66 ± 1.40 | 4.60 ± 1.44 | 4.05 ± 1.68 | 4.42 ± 1.87 | 4.46 ± 1.41 | 4.70 ± 1.70 | 4.82 ± 1.47 | 0.47 | 0.877 | - |
| **Q.20** | 4.76 ± 1.26 | 5.20 ± 1.54 | 5.11 ± 1.41 | 5.00 ± 1.28 | 4.55 ± 1.77 | 4.79 ± 1.81 | 4.83 ± 1.61 | 4.70 ± 1.49 | 4.45 ± 1.44 | 0.80 | 0.602 | - |
| **Q.21** | 4.70 ± 1.13 | 5.16 ± 1.33 | 5.24 ± 1.20 | 5.11 ± 1.30 | 4.73 ± 1.78 | 5.05 ± 1.61 | 4.96 ± 1.27 | 4.80 ± 1.14 | 4.82 ± 1.40 | 0.95 | 0.478 | - |
| **Q.22** | 5.09 ± 1.63 | 5.26 ± 1.55 | 5.53 ± 1.57 | 5.74 ± 1.36 | 5.09 ± 1.82 | 5.16 ± 1.54 | 5.75 ± 0.99 | 4.30 ± 2.41 | 5.27 ± 1.56 | 1.45 | 0.176 | - |
| **Q.23** | 4.79 ± 1.57 | 4.90 ± 1.46 | 5.32 ± 1.45 | 5.40 ± 1.40 | 4.73 ± 1.86 | 5.00 ± 1.70 | 5.58 ± 0.97 | 4.30 ± 2.41 | 5.36 ± 1.57 | 1.54 | 0.143 | - |
| **Q.24** | 4.92 ± 1.10 | 5.12 ± 1.24 | 5.50 ± 1.20 | 5.23 ± 1.03 | 5.18 ± 1.68 | 5.16 ± 1.57 | 5.33 ± 1.37 | 5.50 ± 0.85 | 4.91 ± 1.51 | 0.93 | 0.490 | - |

EBPQ = Evidence Based Practice Questionnaire; Q. = question. Data are reported as mean±SD.

**Table 6. One-way ANOVA EBPQ questions (Q.1-24) for Employment type, with Tukey HSD as post-Hoc test.**

| **EBPQ Question** | **Employment type** | | | **F (2, 286)** | **pValue** | **Tukey HSD** |
| --- | --- | --- | --- | --- | --- | --- |
| **Public**  **(n=89)** | **Private (n=83)** | **Freelance (n=117)** |
| **Q.1** | 3.76 ± 1.98 | 3.07 ± 1.89 | 3.77 ± 2.03 | 3.67 | **0.027** | Private vs Freelance (p = 0.038) |
| **Q.2** | 4.21 ± 1.95 | 4.06 ± 1.80 | 4.46 ± 1.79 | 1.21 | 0.300 | - |
| **Q.3** | 4.01 ± 2.03 | 3.96 ± 1.82 | 4.44 ± 1.76 | 2.02 | 0.134 | - |
| **Q.4** | 5.04 ± 1.83 | 5.11 ± 1.86 | 5.64 ± 1.51 | 3.81 | **0.023** | Public vs Freelance (p = 0.037) |
| **Q.5** | 4.93 ± 1.64 | 5.00 ± 1.93 | 4.66 ± 1.76 | 1.07 | 0.344 | - |
| **Q.6** | 4.72 ± 1.86 | 4.60 ± 1.85 | 4.47 ± 1.87 | 0.46 | 0.634 | - |
| **Q.7** | 3.69 ± 1.65 | 3.78 ± 1.59 | 4.52 ± 1.59 | 8.45 | **0.000** | Public vs Freelance (p = 0.001); Private vs Freelance (p = 0.004) |
| **Q.8** | 5.31 ± 1.45 | 5.37 ± 1.42 | 5.61 ± 1.40 | 1.26 | 0.286 | - |
| **Q.9** | 5.90 ± 1.41 | 6.07 ± 1.45 | 6.21 ± 1.35 | 1.28 | 0.281 | - |
| **Q.10** | 5.58 ± 1.36 | 5.51 ± 1.39 | 5.82 ± 1.24 | 1.57 | 0.209 | - |
| **Q.11** | 3.98 ± 1.64 | 4.18 ± 1.59 | 4.32 ± 1.41 | 1.23 | 0.295 | - |
| **Q.12** | 4.63 ± 1.53 | 4.93 ± 1.45 | 4.94 ± 1.34 | 1.40 | 0.248 | - |
| **Q.13** | 4.70 ± 1.21 | 4.49 ± 1.36 | 4.84 ± 1.26 | 1.76 | 0.174 | - |
| **Q.14** | 4.47 ± 1.55 | 4.53 ± 1.66 | 4.74 ± 1.50 | 0.82 | 0.443 | - |
| **Q.15** | 4.93 ± 1.40 | 4.69 ± 1.52 | 5.19 ± 1.22 | 3.30 | **0.038** | Private vs Freelance (p = 0.030) |
| **Q.16** | 5.39 ± 1.05 | 5.23 ± 1.26 | 5.35 ± 1.12 | 0.48 | 0.620 | - |
| **Q.17** | 4.64 ± 1.49 | 4.75 ± 1.56 | 5.17 ± 1.39 | 3.81 | **0.023** | Public vs Freelance (p = 0.029) |
| **Q.18** | 4.17 ± 1.58 | 4.29 ± 1.66 | 4.67 ± 1.32 | 3.12 | **0.045** | Public vs Freelance (p = 0.050) |
| **Q.19** | 4.37 ± 1.50 | 4.52 ± 1.66 | 4.74 ± 1.30 | 1.68 | 0.189 | - |
| **Q.20** | 4.75 ± 1.49 | 4.77 ± 1.55 | 5.08 ± 1.34 | 1.65 | 0.194 | - |
| **Q.21** | 4.82 ± 1.36 | 4.87 ± 1.33 | 5.12 ± 1.24 | 1.59 | 0.205 | - |
| **Q.22** | 5.34 ± 1.46 | 5.24 ± 1.67 | 5.30 ± 1.62 | 0.08 | 0.923 | - |
| **Q.23** | 5.24 ± 1.42 | 4.80 ± 1.58 | 5.04 ± 1.62 | 1.74 | 0.178 | - |
| **Q.24** | 5.08 ± 1.37 | 5.14 ± 1.21 | 5.23 ± 1.18 | 0.38 | 0.683 | - |

EBPQ = Evidence Based Practice Questionnaire; Q. = question. Data are reported as mean±SD.

**Table 7. One-way ANOVA EBPQ questions (Q.1-24) for Years of service, with Tukey HSD as post-Hoc test.**

| **EBPQ Question** | **Years of service** | | | | | **F (4, 284)** | **pValue** | **Tukey HSD** |
| --- | --- | --- | --- | --- | --- | --- | --- | --- |
| **<5 years (n=87)** | **5–10 years (n=48)** | **11–20 years (n=71)** | **21–30 years (n=40)** | **>30 years (n=43)** |
| **Q.1** | 3.85 ± 1.78 | 3.48 ± 1.99 | 3.34 ± 2.10 | 3.52 ± 2.17 | 3.51 ± 2.05 | 0.71 | 0.586 | - |
| **Q.2** | 4.45 ± 1.74 | 4.35 ± 1.87 | 4.25 ± 1.88 | 4.03 ± 1.97 | 4.07 ± 1.89 | 0.53 | 0.715 | - |
| **Q.3** | 4.18 ± 1.62 | 4.31 ± 2.04 | 4.17 ± 1.81 | 3.95 ± 2.15 | 4.19 ± 2.01 | 0.21 | 0.934 | - |
| **Q.4** | 5.30 ± 1.48 | 5.25 ± 2.08 | 5.37 ± 1.60 | 5.33 ± 1.85 | 5.26 ± 1.97 | 0.04 | 0.996 | - |
| **Q.5** | 4.62 ± 1.69 | 4.71 ± 1.75 | 4.90 ± 1.85 | 5.08 ± 1.70 | 5.12 ± 1.94 | 0.85 | 0.493 | - |
| **Q.6** | 4.14 ± 1.69 | 4.81 ± 2.06 | 4.68 ± 1.75 | 4.92 ± 1.99 | 4.77 ± 1.93 | 1.94 | 0.104 | - |
| **Q.7** | 4.17 ± 1.41 | 3.83 ± 1.77 | 3.83 ± 1.72 | 3.85 ± 1.92 | 4.60 ± 1.50 | 2.03 | 0.090 | - |
| **Q.8** | 5.41 ± 1.33 | 5.71 ± 1.27 | 5.30 ± 1.39 | 5.55 ± 1.54 | 5.38 ± 1.71 | 0.69 | 0.600 | - |
| **Q.9** | 6.37 ± 1.35 | 6.04 ± 1.41 | 6.24 ± 0.93 | 5.60 ± 1.79 | 5.70 ± 1.58 | 3.22 | 0.013 | <5 years vs 21–30 years (p = 0.032) |
| **Q.10** | 5.75 ± 1.36 | 5.54 ± 1.43 | 5.72 ± 1.12 | 5.53 ± 1.50 | 5.63 ± 1.31 | 0.33 | 0.857 | - |
| **Q.11** | 4.21 ± 1.25 | 4.23 ± 1.78 | 4.14 ± 1.58 | 4.05 ± 1.74 | 4.21 ± 1.60 | 0.10 | 0.982 | - |
| **Q.12** | 5.00 ± 1.37 | 4.98 ± 1.31 | 4.96 ± 1.44 | 4.60 ± 1.46 | 4.40 ± 1.61 | 1.83 | 0.123 | - |
| **Q.13** | 4.44 ± 1.19 | 4.81 ± 1.32 | 4.82 ± 1.23 | 4.78 ± 1.54 | 4.81 ± 1.20 | 1.29 | 0.276 | - |
| **Q.14** | 4.70 ± 1.50 | 4.56 ± 1.76 | 4.55 ± 1.60 | 4.62 ± 1.60 | 4.47 ± 1.40 | 0.20 | 0.940 | - |
| **Q.15** | 5.06 ± 1.31 | 5.12 ± 1.48 | 4.85 ± 1.28 | 5.10 ± 1.48 | 4.67 ± 1.46 | 0.97 | 0.426 | - |
| **Q.16** | 5.31 ± 1.02 | 5.31 ± 1.22 | 5.24 ± 1.16 | 5.60 ± 1.10 | 5.28 ± 1.30 | 0.70 | 0.594 | - |
| **Q.17** | 5.08 ± 1.28 | 5.08 ± 1.67 | 4.82 ± 1.43 | 4.83 ± 1.62 | 4.44 ± 1.58 | 1.62 | 0.171 | - |
| **Q.18** | 4.31 ± 1.35 | 4.56 ± 1.67 | 4.51 ± 1.58 | 4.40 ± 1.58 | 4.26 ± 1.51 | 0.40 | 0.811 | - |
| **Q.19** | 4.67 ± 1.26 | 4.58 ± 1.71 | 4.45 ± 1.47 | 4.45 ± 1.63 | 4.63 ± 1.50 | 0.29 | 0.885 | - |
| **Q.20** | 4.85 ± 1.25 | 5.04 ± 1.61 | 4.93 ± 1.41 | 4.88 ± 1.70 | 4.74 ± 1.53 | 0.27 | 0.899 | - |
| **Q.21** | 4.72 ± 1.12 | 5.15 ± 1.41 | 5.10 ± 1.27 | 5.03 ± 1.62 | 4.91 ± 1.27 | 1.19 | 0.314 | - |
| **Q.22** | 5.10 ± 1.59 | 5.31 ± 1.56 | 5.52 ± 1.51 | 5.25 ± 1.68 | 5.33 ± 1.66 | 0.69 | 0.599 | - |
| **Q.23** | 4.86 ± 1.50 | 4.83 ± 1.55 | 5.20 ± 1.50 | 5.08 ± 1.77 | 5.28 ± 1.56 | 0.93 | 0.445 | - |
| **Q.24** | 5.00 ± 1.11 | 5.00 ± 1.22 | 5.31 ± 1.23 | 5.28 ± 1.50 | 5.30 ± 1.32 | 1.04 | 0.389 | - |

EBPQ = Evidence Based Practice Questionnaire; Q. = question. Data are reported as mean±SD.


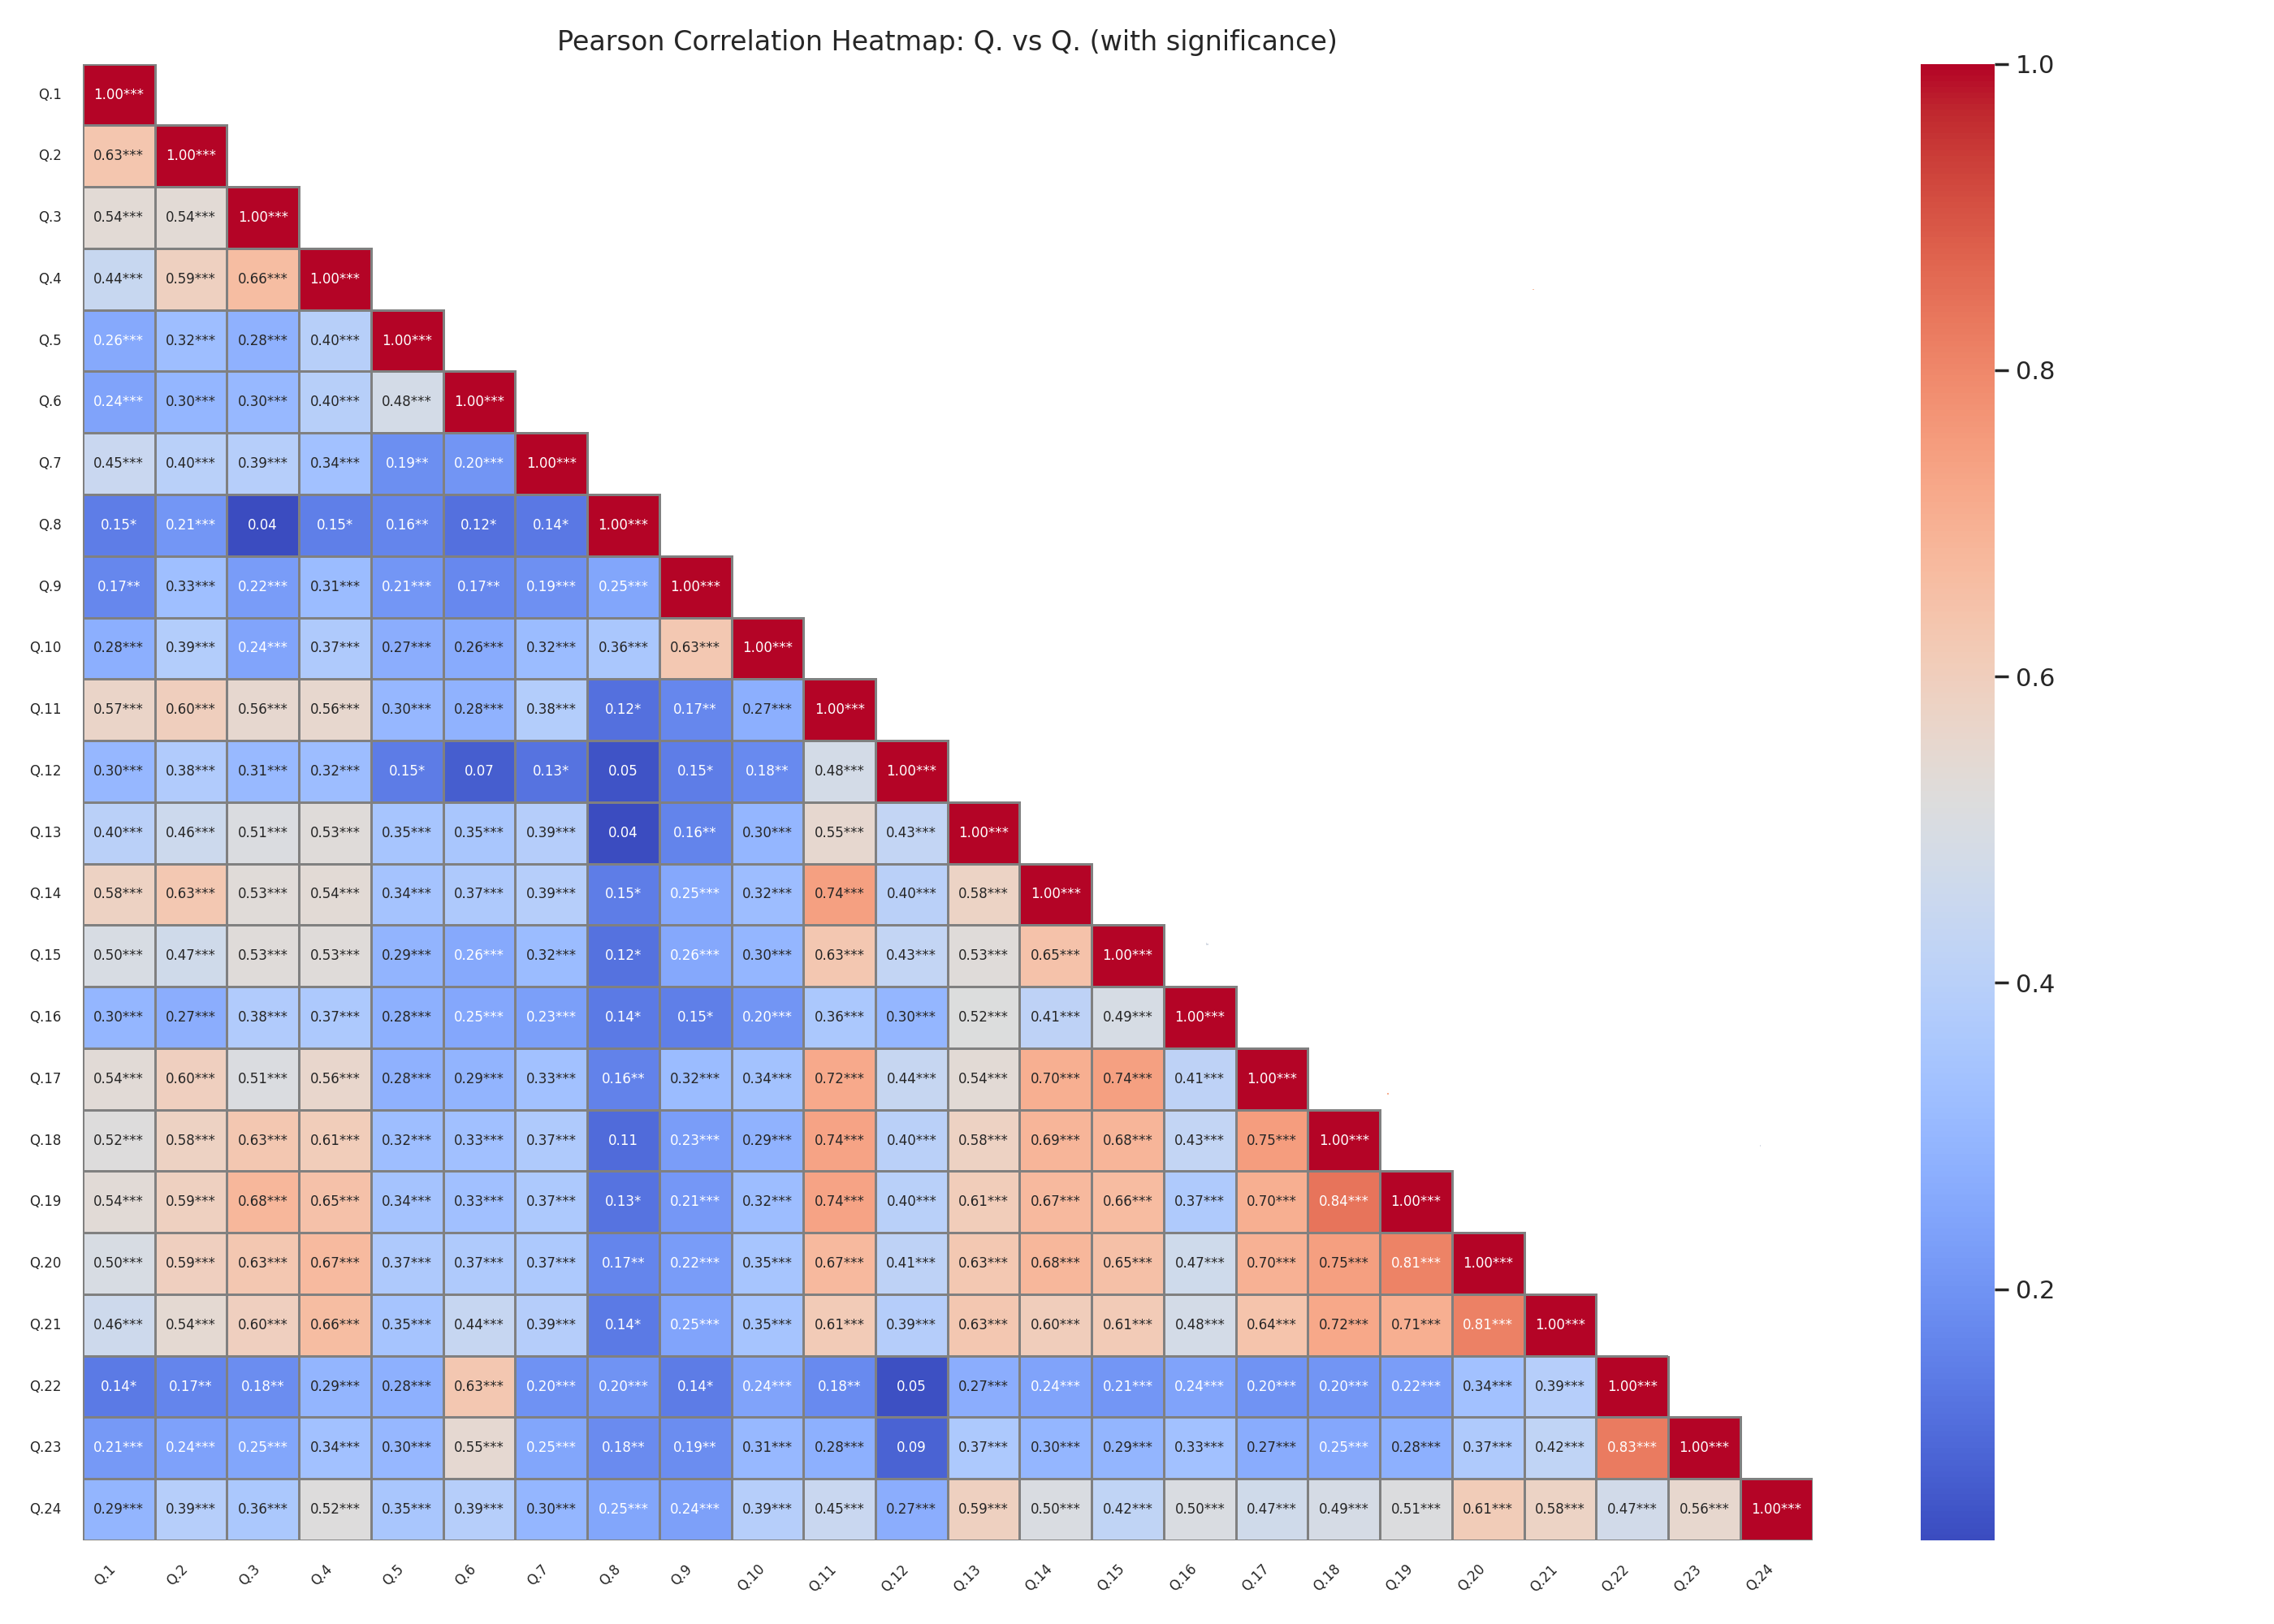


**Figure 1. Heatmap reporting Pearson correlation analysis between EBPQ questions (Q.1-24).** *p>0.05, **p < 0.01, ***p<0.001, Pearson correlation.Q. = question.

**Table 8. Independent samples t-test analysis for Supplementary questions (S.Q.1-9) for Sex, Team size (physioterapists), and Multidisciplinary team.**

| **Supplementary Question** | **Sex** | | **t (287)** | **pValue** | **Multidisciplinary team** | | **t (287)** | **pValue** | **Team size (physioterapists)** | | | **t (287)** | | **pValue** |
| --- | --- | --- | --- | --- | --- | --- | --- | --- | --- | --- | --- | --- | --- | --- |
| **Male (n=135)** | **Female (n=154)** | **Yes (n=193)** | **No**  **(n=96)** | **≤6**  **(n=134)** | **>6**  **(n=155)** | 0.89 | | 0.375 | |
| **S.Q.1** | 4.20 ± 1.71 | 4.01 ± 1.60 | 0.95 | 0.341 | 4.08 ± 1.61 | 4.14 ± 1.76 | 0.25 | 0.806 | 4.19 ± 1.73 | 4.02 ± 1.59 | -2.10 | | **0.037** | |
| **S.Q.2** | 2.26 ± 1.57 | 2.71 ± 1.87 | 2.21 | **0.028** | 2.58 ± 1.80 | 2.33 ± 1.64 | -1.17 | 0.245 | 2.27 ± 1.66 | 2.70 ± 1.81 | 1.32 | | 0.189 | |
| **S.Q.3** | 5.89 ± 1.16 | 5.88 ± 1.24 | -0.04 | 0.967 | 5.91 ± 1.23 | 5.83 ± 1.14 | -0.54 | 0.592 | 5.99 ± 1.15 | 5.80 ± 1.24 | 0.10 | | 0.918 | |
| **S.Q.4** | 3.16 ± 1.53 | 3.27 ± 1.50 | 0.61 | 0.540 | 3.29 ± 1.52 | 3.08 ± 1.50 | -1.10 | 0.273 | 3.23 ± 1.54 | 3.21 ± 1.49 | 0.06 | | 0.955 | |
| **S.Q.5** | 3.17 ± 1.78 | 3.09 ± 1.76 | -0.38 | 0.704 | 3.10 ± 1.76 | 3.18 ± 1.78 | 0.33 | 0.740 | 3.13 ± 1.70 | 3.12 ± 1.82 | -0.53 | | 0.595 | |
| **S.Q.6** | 3.17 ± 1.79 | 2.46 ± 1.76 | -3.38 | **0.001** | 2.69 ± 1.80 | 2.99 ± 1.82 | 1.30 | 0.194 | 2.73 ± 1.83 | 2.85 ± 1.80 | 3.23 | | **0.001** | |
| **S.Q.7** | 3.90 ± 2.03 | 3.88 ± 1.85 | -0.09 | 0.929 | 3.97 ± 1.87 | 3.74 ± 2.06 | 0.22 | 0.360 | 4.28 ± 1.97 | 3.55 ± 1.85 | 0.21 | | 0.831 | |
| **S.Q.8** | 5.07 ± 1.78 | 4.73 ± 1.91 | -1.57 | 0.119 | 4.88 ± 1.85 | 4.93 ± 1.89 | 0.40 | 0.826 | 4.92 ± 1.86 | 4.87 ± 1.86 | 1.88 | | 0.062 | |
| **S.Q.9** | 5.68 ± 1.48 | 5.38 ± 1.58 | -1.69 | 0.093 | 5.49 ± 1.49 | 5.57 ± 1.65 | 0.25 | 0.686 | 5.70 ± 1.54 | 5.36 ± 1.54 | 0.89 | | 0.375 | |

S.Q. = supplementary question. Data are reported as mean±SD.

**Table 9. One-way ANOVA Supplementary questions (S.Q.1-9) for English proficiency, with Tukey HSD as post-Hoc test.**

| **Supplementary Question** | **English proficiency** | | | | **F (3, 285)** | | **pValue** | **Tukey HSD** |
| --- | --- | --- | --- | --- | --- | --- | --- | --- |
| **Poor (n=35)** | **Moderate (n=95)** | **Good (n=115)** | **Excellent (n=44)** |  |  | |  |
| **S.Q.1** | 4.31 ± 1.53 | 4.05 ± 1.63 | 4.04 ± 1.60 | 4.18 ± 1.97 | 0.30 | 0.825 | | - |
| **S.Q.2** | 2.57 ± 1.72 | 2.78 ± 1.90 | 2.51 ± 1.72 | 1.80 ± 1.30 | 3.28 | **0.021** | | Moderate vs Good (p = 0.011) |
| **S.Q.3** | 5.69 ± 1.18 | 5.81 ± 1.10 | 5.84 ± 1.34 | 6.32 ± 0.96 | 2.43 | 0.065 | | - |
| **S.Q.4** | 3.31 ± 1.49 | 3.33 ± 1.60 | 3.26 ± 1.52 | 2.82 ± 1.28 | 1.27 | 0.286 | | - |
| **S.Q.5** | 3.51 ± 2.08 | 3.23 ± 1.75 | 3.18 ± 1.68 | 2.45 ± 1.62 | 2.89 | **0.036** | | Poor vs Good (p = 0.039) |
| **S.Q.6** | 2.89 ± 1.78 | 2.85 ± 1.92 | 2.86 ± 1.80 | 2.41 ± 1.62 | 0.78 | 0.507 | | - |
| **S.Q.7** | 3.91 ± 1.82 | 3.93 ± 1.95 | 3.65 ± 1.81 | 4.43 ± 2.25 | 1.75 | 0.156 | | - |
| **S.Q.8** | 4.09 ± 2.02 | 4.62 ± 1.85 | 5.19 ± 1.67 | 5.34 ± 1.95 | 4.92 | **0.002** | | Poor vs Good (p = 0.010); Poor vs Excellent (p = 0.013) |
| **S.Q.9** | 5.03 ± 1.67 | 5.48 ± 1.56 | 5.59 ± 1.52 | 5.80 ± 1.42 | 1.76 | 0.155 | | - |

S.Q. = supplementary question. Data are reported as mean±SD.

**Table 10. One-way ANOVA Supplementary questions (S.Q.1-9) for Highest degree, with Tukey HSD as post-Hoc test.**

| **Supplementary Question** | **Highest degree** | | | **F (2, 286)** | **pValue** | **Tukey HSD** |
| --- | --- | --- | --- | --- | --- | --- |
| **Bachelor’s degree (n=155)** | **2-years Master degree (n=43)** | **Other (n=91)** |
| **S.Q.1** | 4.16 ± 1.61 | 3.72 ± 1.64 | 4.18 ± 1.72 | 1.33 | 0.265 | - |
| **S.Q.2** | 2.52 ± 1.69 | 2.60 ± 2.00 | 2.42 ± 1.75 | 0.18 | 0.833 | - |
| **S.Q.3** | 5.83 ± 1.18 | 6.02 ± 1.34 | 5.91 ± 1.17 | 0.46 | 0.634 | - |
| **S.Q.4** | 3.36 ± 1.50 | 3.02 ± 1.75 | 3.08 ± 1.40 | 1.45 | 0.236 | - |
| **S.Q.5** | 3.17 ± 1.74 | 2.84 ± 1.86 | 3.19 ± 1.78 | 0.68 | 0.505 | - |
| **S.Q.6** | 2.90 ± 1.80 | 2.37 ± 1.88 | 2.81 ± 1.78 | 1.43 | 0.241 | - |
| **S.Q.7** | 3.79 ± 1.89 | 3.95 ± 1.80 | 4.04 ± 2.08 | 0.53 | 0.591 | - |
| **S.Q.8** | 4.69 ± 1.87 | 5.47 ± 1.68 | 4.97 ± 1.87 | 3.08 | **0.048** | Bachelor’s degree vs 2-years master’s degree (p = 0.041) |
| **S.Q.9** | 5.41 ± 1.50 | 5.72 ± 1.47 | 5.60 ± 1.65 | 0.87 | 0.419 | - |

S.Q. = supplementary question. Data are reported as mean±SD.

**Table 11. One-way ANOVA Supplementary questions (S.Q.1-9) for Years since bachelor’s degree, with Tukey HSD as post-Hoc test.**

| **Supplementary Question** | **Years since bachelor’s degree** | | | | | | | | | **F (2, 286)** | **pValue** | **Tukey HSD** |
| --- | --- | --- | --- | --- | --- | --- | --- | --- | --- | --- | --- | --- |
| **<5 years (n=80)** | **6–10 years (n=50)** | **11–15 years (n=38)** | **16–20 years (n=35)** | **21–25 years (n=22)** | **26–30 years (n=19)** | **31–35 years (n=24)** | **36–40 years (n=10)** | **>40 years (n=11)** |
| **S.Q.1** | 3.96 ± 1.50 | 3.90 ± 1.87 | 4.32 ± 1.92 | 4.34 ± 1.37 | 4.14 ± 2.08 | 3.79 ± 1.08 | 4.62 ± 1.47 | 3.70 ± 1.95 | 4.18 ± 1.60 | 0.79 | 0.608 | - |
| **S.Q.2** | 2.55 ± 1.54 | 2.14 ± 1.60 | 2.32 ± 1.76 | 1.89 ± 1.28 | 2.77 ± 2.20 | 2.95 ± 2.07 | 3.33 ± 2.04 | 3.30 ± 2.41 | 2.45 ± 1.51 | 2.09 | **0.037** | 16–20 years vs 31–35 years (p = 0.044) |
| **S.Q.3** | 5.78 ± 1.14 | 6.02 ± 1.08 | 5.84 ± 1.50 | 5.97 ± 1.12 | 5.91 ± 1.41 | 6.00 ± 1.29 | 5.75 ± 1.33 | 5.90 ± 0.99 | 6.00 ± 0.77 | 0.26 | 0.978 | - |
| **S.Q.4** | 3.31 ± 1.34 | 2.92 ± 1.51 | 3.03 ± 1.50 | 3.03 ± 1.32 | 3.36 ± 1.92 | 4.05 ± 1.22 | 3.46 ± 1.84 | 2.80 ± 1.87 | 3.36 ± 1.63 | 1.37 | 0.209 | - |
| **S.Q.5** | 3.83 ± 1.68 | 2.84 ± 1.78 | 2.82 ± 1.41 | 2.71 ± 1.56 | 2.68 ± 1.84 | 2.79 ± 1.90 | 3.50 ± 1.98 | 2.60 ± 1.96 | 2.91 ± 1.92 | 2.77 | **0.006** | <5 years vs 6–10 years (p = 0.044); <5 years vs 16–20 years (p = 0.043) |
| **S.Q.6** | 3.40 ± 1.67 | 3.04 ± 1.95 | 2.68 ± 1.66 | 2.37 ± 1.65 | 1.91 ± 1.80 | 2.42 ± 1.84 | 2.46 ± 1.93 | 3.20 ± 2.15 | 1.73 ± 0.90 | 3.07 | **0.003** | <5 years vs 21–25 years (p = 0.015) |
| **S.Q.7** | 3.52 ± 1.97 | 3.86 ± 1.84 | 3.95 ± 2.18 | 4.00 ± 1.75 | 4.41 ± 2.15 | 4.21 ± 1.55 | 4.38 ± 1.61 | 3.30 ± 2.63 | 4.09 ± 1.92 | 0.96 | 0.471 | - |
| **S.Q.8** | 4.88 ± 1.77 | 4.86 ± 1.96 | 5.24 ± 1.58 | 4.77 ± 2.14 | 4.91 ± 2.22 | 4.74 ± 1.82 | 4.62 ± 2.00 | 5.70 ± 1.06 | 4.45 ± 1.69 | 0.57 | 0.803 | - |
| **S.Q.9** | 5.76 ± 1.46 | 5.66 ± 1.57 | 5.87 ± 1.30 | 5.09 ± 1.62 | 5.73 ± 1.58 | 4.89 ± 1.59 | 5.12 ± 1.70 | 5.20 ± 1.32 | 5.09 ± 1.81 | 1.72 | 0.094 | - |

S.Q. = supplementary question. Data are reported as mean±SD.

**Table 12. One-way ANOVA Supplementary questions (S.Q.1-9) for Age, with Tukey HSD as post-Hoc test.**

| **Supplementary Question** | **Age (years)** | | | | | **F (4, 284)** | **pValue** | **Tukey HSD** |
| --- | --- | --- | --- | --- | --- | --- | --- | --- |
| **20-29 (n=87)** | **30-39 (n=83)** | **40-49 (n=48)** | **50-59 (n=55)** | **>60**  **(n=16)** |
| **S.Q.1** | 3.99 ± 1.60 | 4.28 ± 1.74 | 3.92 ± 1.78 | 4.27 ± 1.57 | 3.75 ± 1.39 | 0.81 | 0.519 | - |
| **S.Q.2** | 2.48 ± 1.56 | 2.13 ± 1.51 | 2.48 ± 1.89 | 3.18 ± 2.14 | 2.19 ± 1.47 | 3.23 | **0.013** | 30-39 vs 50-59 (p = 0.005) |
| **S.Q.3** | 5.91 ± 1.11 | 5.88 ± 1.27 | 5.85 ± 1.35 | 5.87 ± 1.22 | 5.94 ± 0.85 | 0.03 | 0.999 | - |
| **S.Q.4** | 3.25 ± 1.42 | 3.13 ± 1.38 | 3.06 ± 1.58 | 3.64 ± 1.68 | 2.56 ± 1.67 | 2.03 | 0.090 | - |
| **S.Q.5** | 3.61 ± 1.77 | 3.02 ± 1.59 | 2.60 ± 1.71 | 3.13 ± 1.93 | 2.62 ± 1.75 | 3.16 | **0.015** | 20-29 vs 40-49 (p = 0.013) |
| **S.Q.6** | 3.36 ± 1.74 | 2.89 ± 1.74 | 2.08 ± 1.67 | 2.67 ± 1.97 | 1.75 ± 1.18 | 5.77 | **<0.001** | 20-29 vs 40-49 (p = 0.001); 20-29 vs >60 (p = 0.007) |
| **S.Q.7** | 3.64 ± 1.93 | 4.12 ± 1.86 | 3.62 ± 2.14 | 4.15 ± 1.87 | 4.00 ± 1.86 | 1.12 | 0.345 | - |
| **S.Q.8** | 4.98 ± 1.77 | 4.94 ± 1.86 | 4.73 ± 2.15 | 4.96 ± 1.84 | 4.44 ± 1.55 | 0.41 | 0.803 | - |
| **S.Q.9** | 5.82 ± 1.46 | 5.53 ± 1.49 | 5.52 ± 1.58 | 5.15 ± 1.63 | 5.12 ± 1.67 | 1.90 | 0.111 | - |

S.Q. = supplementary question. Data are reported as mean±SD.

**Table 13. One-way ANOVA Supplementary questions (S.Q.1-9) for Years of service, with Tukey HSD as post-Hoc test.**

| **Supplementary Question** | **Years of service** | | | | | **F (4, 284)** | **pValue** | **Tukey HSD** |
| --- | --- | --- | --- | --- | --- | --- | --- | --- |
| **<5 years (n=87)** | **5–10 years (n=48)** | **11–20 years (n=71)** | **21–30 years (n=40)** | **>30 years (n=43)** |
| **S.Q.1** | 3.97 ± 1.54 | 3.94 ± 1.86 | 4.21 ± 1.70 | 4.17 ± 1.71 | 4.30 ± 1.54 | 0.52 | 0.723 | - |
| **S.Q.2** | 2.57 ± 1.58 | 2.19 ± 1.70 | 2.10 ± 1.48 | 2.88 ± 2.20 | 3.00 ± 1.94 | 2.76 | 0.028 | - |
| **S.Q.3** | 5.78 ± 1.17 | 6.12 ± 0.98 | 5.82 ± 1.31 | 5.95 ± 1.34 | 5.88 ± 1.18 | 0.72 | 0.576 | - |
| **S.Q.4** | 3.37 ± 1.41 | 2.77 ± 1.37 | 3.20 ± 1.47 | 3.33 ± 1.58 | 3.37 ± 1.83 | 1.43 | 0.223 | - |
| **S.Q.5** | 3.89 ± 1.71 | 2.67 ± 1.65 | 2.83 ± 1.50 | 2.60 ± 1.78 | 3.09 ± 1.95 | 6.71 | 0.000 | <5 years vs 5–10 years (p = 0.001); <5 years vs 11–20 years (p = 0.001); <5 years vs 21–30 years (p = 0.001) |
| **S.Q.6** | 3.43 ± 1.75 | 3.00 ± 1.85 | 2.48 ± 1.61 | 2.23 ± 1.82 | 2.33 ± 1.84 | 5.36 | 0.000 | <5 years vs 11–20 years (p = 0.008); <5 years vs 21–30 years (p = 0.004); <5 years vs >30 years (p = 0.008) |
| **S.Q.7** | 3.59 ± 1.99 | 3.83 ± 1.89 | 3.89 ± 1.92 | 4.33 ± 1.93 | 4.19 ± 1.88 | 1.31 | 0.267 | - |
| **S.Q.8** | 4.95 ± 1.74 | 4.71 ± 1.98 | 4.93 ± 1.93 | 5.00 ± 1.89 | 4.81 ± 1.85 | 0.20 | 0.939 | - |
| **S.Q.9** | 5.79 ± 1.43 | 5.60 ± 1.62 | 5.41 ± 1.51 | 5.40 ± 1.57 | 5.16 ± 1.68 | 1.45 | 0.216 | - |

S.Q. = supplementary question. Data are reported as mean±SD.

**Table 14. One-way ANOVA Supplementary questions (S.Q.1-9) for Employment type, with Tukey HSD as post-Hoc test.**

| **Supplementary Question** | **Employment type** | | | **F (2, 286)** | **pValue** | **Tukey HSD** |
| --- | --- | --- | --- | --- | --- | --- |
| **Public**  **(n=89)** | **Private (n=83)** | **Freelance (n=117)** |
| **S.Q.1** | 3.98 ± 1.56 | 3.86 ± 1.65 | 4.37 ± 1.70 | 2.71 | 0.068 | - |
| **S.Q.2** | 2.81 ± 1.89 | 2.72 ± 1.88 | 2.10 ± 1.46 | 5.23 | **0.006** | Public vs Freelance (p = 0.011); Private vs Freelance (p = 0.034) |
| **S.Q.3** | 5.83 ± 1.12 | 5.76 ± 1.24 | 6.02 ± 1.23 | 1.26 | 0.287 | - |
| **S.Q.4** | 2.99 ± 1.58 | 3.60 ± 1.45 | 3.13 ± 1.47 | 3.98 | **0.020** | Public vs Private (p = 0.021) |
| **S.Q.5** | 2.75 ± 1.72 | 3.54 ± 1.72 | 3.12 ± 1.78 | 4.39 | **0.013** | Public vs Private (p = 0.009) |
| **S.Q.6** | 2.31 ± 1.72 | 3.00 ± 1.81 | 3.01 ± 1.82 | 4.60 | **0.011** | Public vs Private (p = 0.033); Public vs Freelance (p = 0.017) |
| **S.Q.7** | 3.70 ± 1.79 | 3.33 ± 1.76 | 4.44 ± 2.03 | 9.27 | **0.000** | Public vs Freelance (p = 0.014); Private vs Freelance (p = 0.000) |
| **S.Q.8** | 4.56 ± 1.85 | 4.81 ± 1.82 | 5.21 ± 1.85 | 3.20 | **0.042** | Public vs Freelance (p = 0.036) |
| **S.Q.9** | 5.53 ± 1.41 | 5.19 ± 1.52 | 5.74 ± 1.63 | 3.14 | **0.045** | Private vs Freelance (p = 0.034) |

S.Q. = supplementary question. Data are reported as mean±SD.


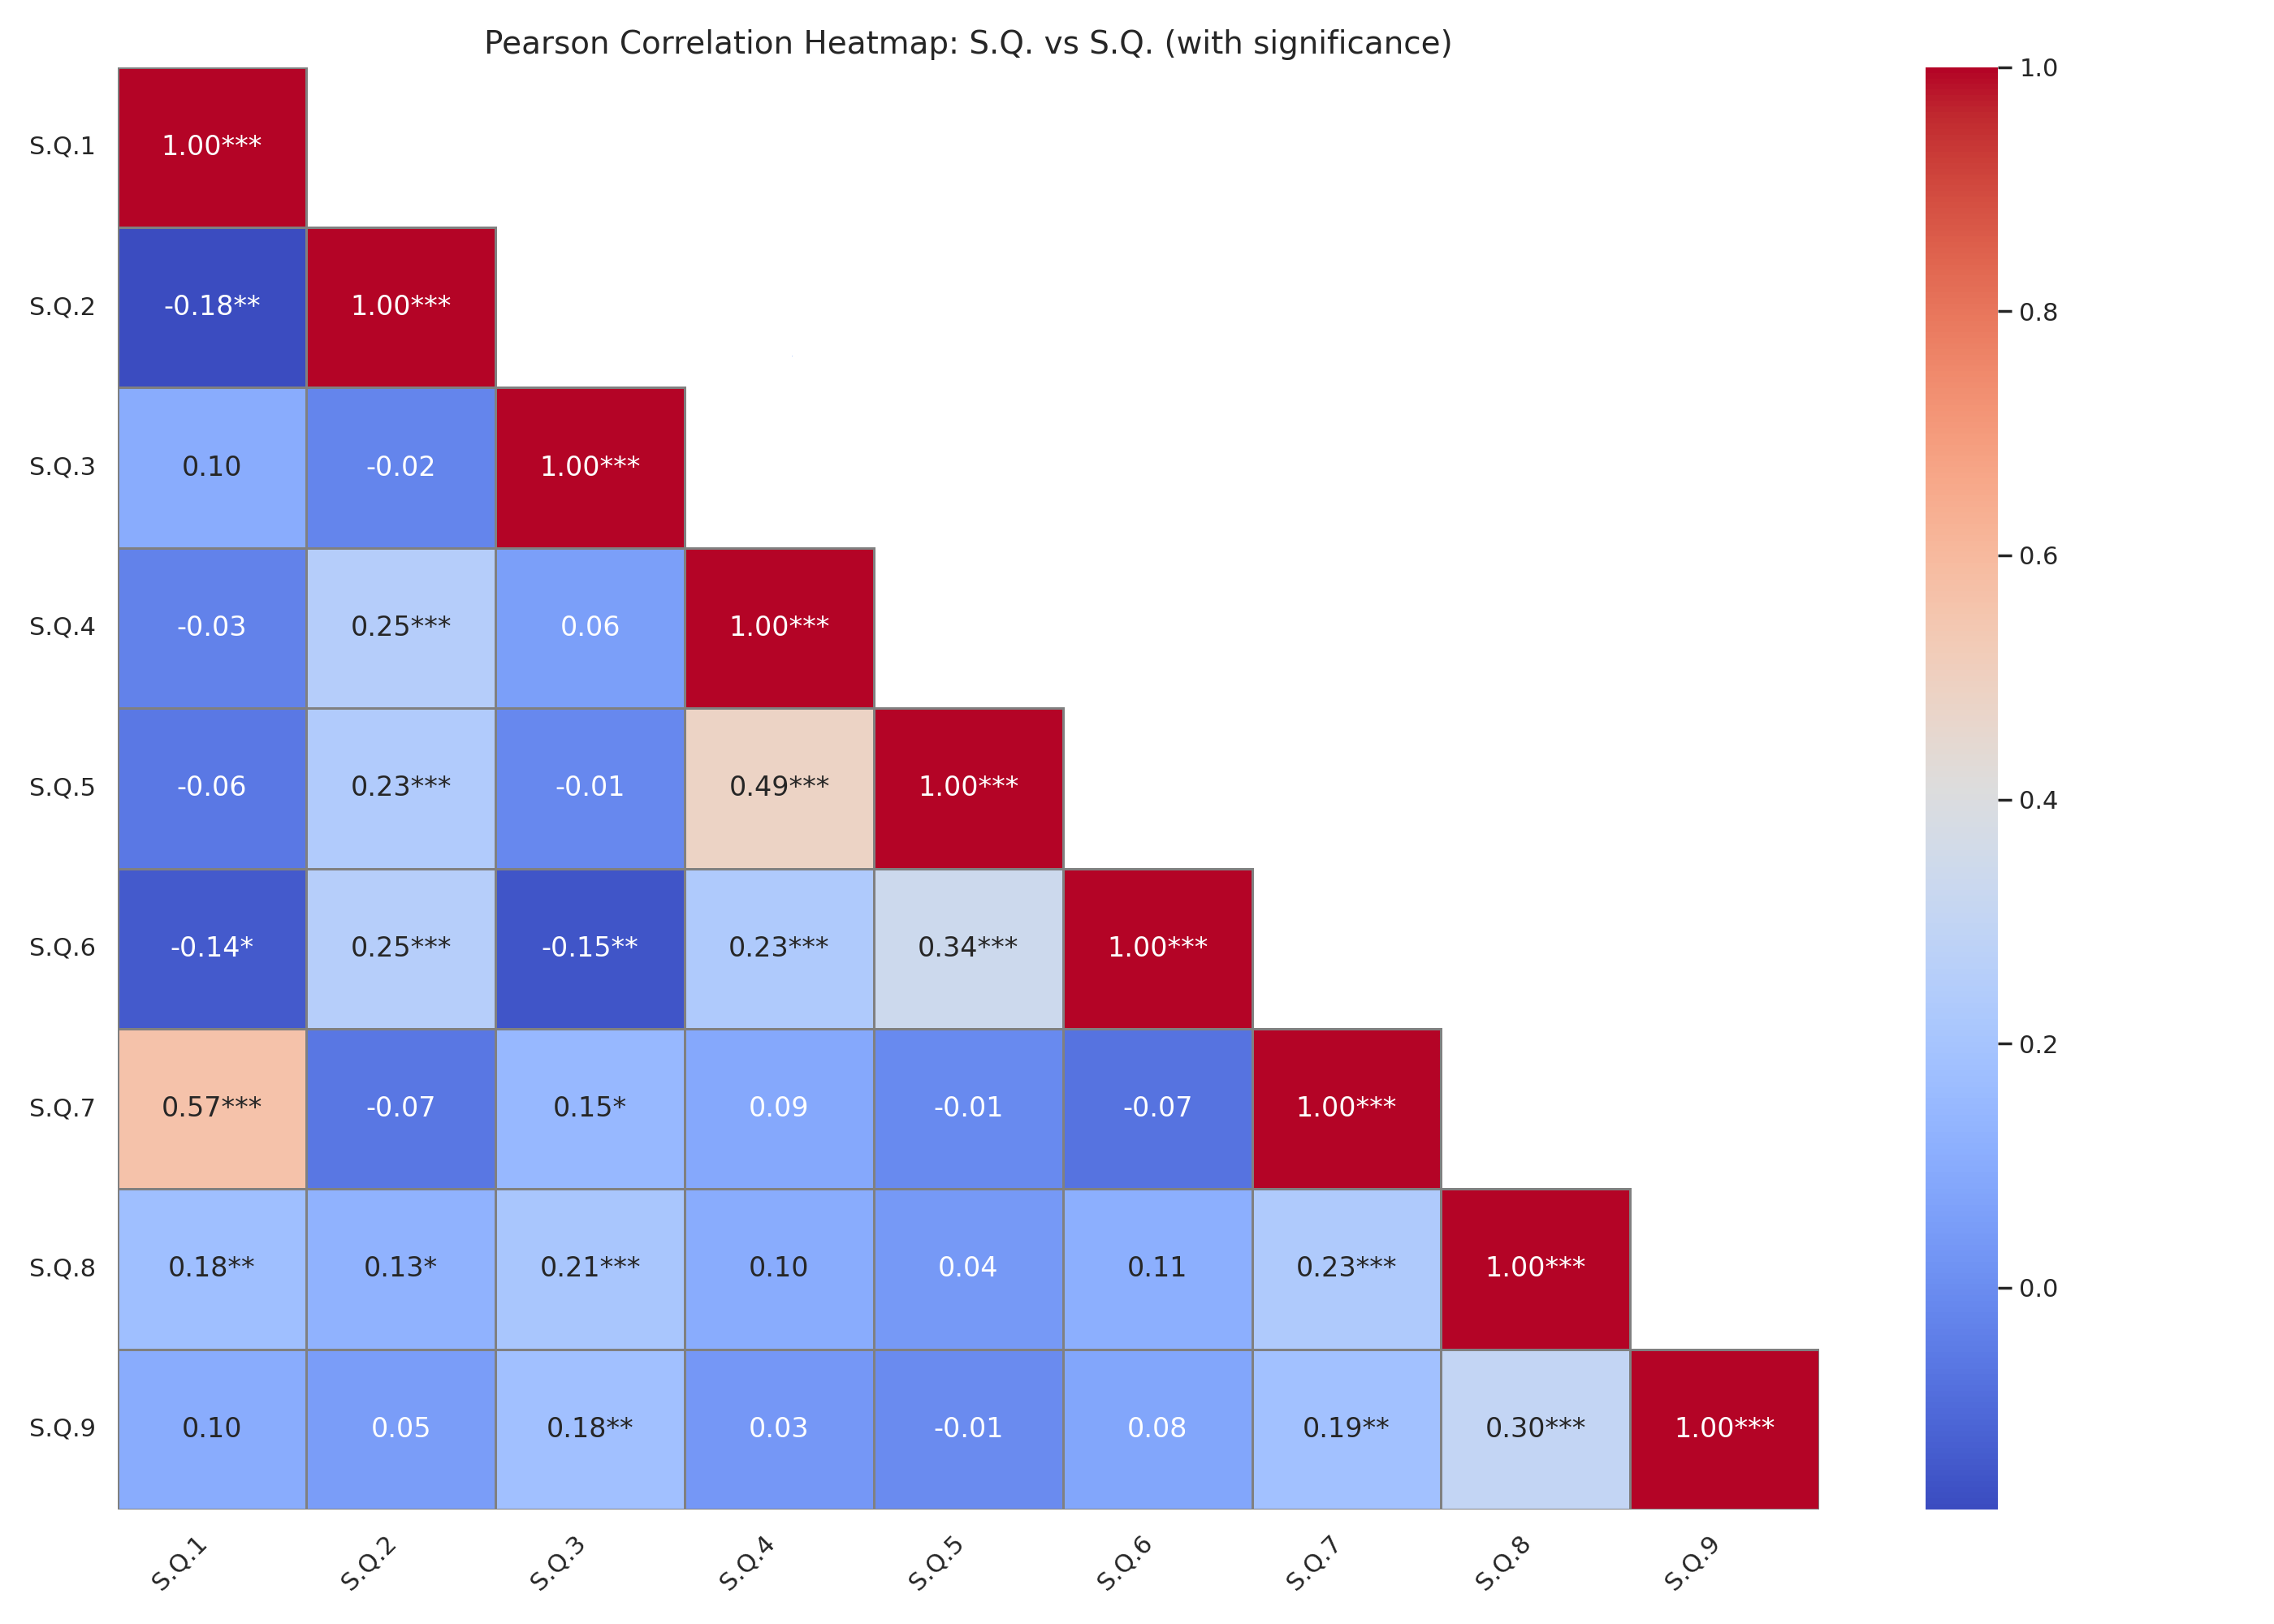


**Figure 2. Heatmap reporting Pearson correlation analysis between Supplementary questions (S.Q.1-9).** *p>0.05, **p < 0.01, ***p<0.001, Pearson correlation. S.Q. = supplementary question.
