# Supplementary material for: Evidence-Based Practice Among Italian Physiotherapists: A National Cross- Sectional Survey on Competencies and Contextual Determinants
Source: Research Square preprint supplement (doi:10.21203/rs.3.rs-8106667/v1), 2025-12-30
Supplement: Supplementary file 2 [file a1c4e3be035a7466d837b544.docx]

**APPENDIX**

**"Evidence-Based Practice Among Italian Physiotherapists: A National Survey"**

**SECTION 1. Demographic and Background Information**

*For the following items, place a mark x in the appropriate box next that indicates your response*

1. What is you sex?
   1. Male
   2. Female
   3. Other (please specify): _____________
2. What is your age:
   1. 20-29
   2. 30-39
   3. 40-49
   4. 50-59
   5. >60
3. Region of primary professional activity:
   1. North
   2. Centre
   3. South
4. City size of primary practice:
   1. < 10,000 inhabitants
   2. 10,000-100,000 inhabitants
   3. > 100,000 inhabitants
5. Main occupation:
   1. Clinical care
   2. Management/coordination
   3. Research
   4. Teaching/Education
   5. Other: ____________
6. Years since obtaining a Bachelor's degree in Physiotherapy (or equivalent):
   1. <5
   2. 6-10
   3. 11-15
   4. 16-20
   5. 21-25
   6. 26-30
   7. 31-35
   8. 36-40
   9. >40
7. Highest university degree obtained:
   1. Bachelor's degree
   2. 2-years Master’s degree
   3. Other
8. Have you ever participated in research projects?
   1. Yes
   2. No
9. Have you had experience in education/teaching?
   1. Yes
   2. No
10. English language proficiency:
    1. Poor
    2. Moderate
    3. Good
    4. Excellent
11. Physiotherapy area:
    1. Musculoskeletal/Orthopedic
    2. Cardiorespiratory
    3. Neurological
    4. Sports
    5. Pediatric
    6. Uro-Gynecologic
    7. Geriatrics
    8. Other: ____________
12. Years of professional experience:
    1. <5
    2. 5-10
    3. 11-20
    4. 21-30
    5. >30
13. Weekly working hours:
    1. 0-24
    2. 25-48
    3. >48
14. Do you work in a multidisciplinary team?
    1. Yes
    2. No
15. Number of physiotherapists at your workplace:
    1. ≤6
    2. >6

**SECTION 2. Evidence Based Practice Questionnaire (EBPQ)** (23)

**Evidence Based Practice Questionnaire (EBPQ).**

This questionnaire is designed to gather information and opinions on the use of Evidence-Based Practice amongst health professionals. There are no right or wrong answers for we are interested in *your* opinions and *your* own use of evidence in *your* practice.

**1. Considering your practice in relation to an individual patient’s care over the *past* year, how often have you done the following in response to a gap in your knowledge (please √ or X):**

| Formulated a clearly answerable question as the beginning of the process towards filling this gap: | | | | | | | | |
| --- | --- | --- | --- | --- | --- | --- | --- | --- |
| **Never** | 🞏 | 🞏 | 🞏 | 🞏 | 🞏 | 🞏 | 🞏 | **Frequently** |
| Tracked down the relevant evidence once you have formulated the question: | | | | | | | | |
| **Never** | | 🞏 | 🞏 | 🞏 | 🞏 | 🞏 | 🞏 | 🞏 | | --- | --- | --- | --- | --- | --- | --- | | | | | | | | **Frequently** |
| Critically appraised, against set criteria, any literature you have discovered: | | | | | | | | |
| **Never** | | 🞏 | 🞏 | 🞏 | 🞏 | 🞏 | 🞏 | 🞏 | | --- | --- | --- | --- | --- | --- | --- | | | | | | | | **Frequently** |
| Integrated the evidence you have found with your expertise: | | | | | | | | |
| **Never** | | 🞏 | 🞏 | 🞏 | 🞏 | 🞏 | 🞏 | 🞏 | | --- | --- | --- | --- | --- | --- | --- | | | | | | | | **Frequently** |
| Evaluated the outcomes of your practice: | | | | | | | | |
| **Never** | | 🞏 | 🞏 | 🞏 | 🞏 | 🞏 | 🞏 | 🞏 | | --- | --- | --- | --- | --- | --- | --- | | | | | | | | **Frequently** |
| Shared this information with colleagues: | | | | | | | | |
| **Never** | | 🞏 | 🞏 | 🞏 | 🞏 | 🞏 | 🞏 | 🞏 | | --- | --- | --- | --- | --- | --- | --- | | | | | | | | **Frequently** |

**2. Please indicate (by √ or X) where on the scale you would place yourself for each of the following pairs of statements:**

| My workload is too great for me to keep up to date with all the new evidence | 🞏 | 🞏 | 🞏 | 🞏 | 🞏 | 🞏 | 🞏 | New evidence is so important that I make the time in my work schedule |
| --- | --- | --- | --- | --- | --- | --- | --- | --- |
| I resent having my clinical practice questioned | 🞏 | 🞏 | 🞏 | 🞏 | 🞏 | 🞏 | 🞏 | I welcome questions on my practice |
| Evidence based practice is a waste of time | 🞏 | 🞏 | 🞏 | 🞏 | 🞏 | 🞏 | 🞏 | Evidence based practice is fundamental to professional practice |
| I stick to tried and trusted methods rather than changing to anything new | 🞏 | 🞏 | 🞏 | 🞏 | 🞏 | 🞏 | 🞏 | My practice has changed because of evidence I have found |

**3. On a scale of 1 to 7 (with 7 being the best) how would you rate your:**

| **Please circle one number for each statement** | | | | | | | |
| --- | --- | --- | --- | --- | --- | --- | --- |
|  | **Poor Best** | | | | | | |
| Research skills | 1 | 2 | 3 | 4 | 5 | 6 | 7 |
| IT skills | 1 | 2 | 3 | 4 | 5 | 6 | 7 |
| Monitoring and reviewing of practice skills | 1 | 2 | 3 | 4 | 5 | 6 | 7 |
| Converting your information needs into a research question | 1 | 2 | 3 | 4 | 5 | 6 | 7 |
| Awareness of major information types and sources | 1 | 2 | 3 | 4 | 5 | 6 | 7 |
| Ability to identify gaps in your professional practice | 1 | 2 | 3 | 4 | 5 | 6 | 7 |
| Knowledge of how to retrieve evidence | 1 | 2 | 3 | 4 | 5 | 6 | 7 |
| Ability to analyse critically evidence against set standards | 1 | 2 | 3 | 4 | 5 | 6 | 7 |
| Ability to determine how valid (close to the truth) the material is | 1 | 2 | 3 | 4 | 5 | 6 | 7 |
| Ability to determine how useful (clinically applicable) the material is | 1 | 2 | 3 | 4 | 5 | 6 | 7 |
| Ability to apply information to individual cases | 1 | 2 | 3 | 4 | 5 | 6 | 7 |
| Sharing of ideas and information with colleagues | 1 | 2 | 3 | 4 | 5 | 6 | 7 |
| Dissemination of new ideas about care to colleagues | 1 | 2 | 3 | 4 | 5 | 6 | 7 |
| Ability to review your own practice | 1 | 2 | 3 | 4 | 5 | 6 | 7 |

**SECTION 3. Contextual Factors** (26)

*For the following items, place a mark x in the appropriate box next that indicates your response*

1. The physical therapist colleagues with whom I spend most of my working time have a high regard for practice according to the evidence.

|  | 1 | 2 | 3 | 4 | 5 | 6 | 7 |  |
| --- | --- | --- | --- | --- | --- | --- | --- | --- |
| Strongly Disagree |  |  |  |  |  |  |  | Strongly Agree |

1. I feel limited in integrating scientific evidence into my clinical practice because of the judgment of my colleagues.

|  | 1 | 2 | 3 | 4 | 5 | 6 | 7 |  |
| --- | --- | --- | --- | --- | --- | --- | --- | --- |
| Strongly Disagree |  |  |  |  |  |  |  | Strongly Agree |

1. I integrate the patient's needs, values, and expectations into my clinical practice

|  | 1 | 2 | 3 | 4 | 5 | 6 | 7 |  |
| --- | --- | --- | --- | --- | --- | --- | --- | --- |
| Strongly Disagree |  |  |  |  |  |  |  | Strongly Agree |

1. I go along with the patient's expectations of the type of treatment, even if it is not supported by the evidence or is in opposition to it

|  | 1 | 2 | 3 | 4 | 5 | 6 | 7 |  |
| --- | --- | --- | --- | --- | --- | --- | --- | --- |
| Strongly Disagree |  |  |  |  |  |  |  | Strongly Agree |

1. The possibility that the patient will no longer rely on me because I have not met his or her treatment expectations worries me

|  | 1 | 2 | 3 | 4 | 5 | 6 | 7 |  |
| --- | --- | --- | --- | --- | --- | --- | --- | --- |
| Strongly Disagree |  |  |  |  |  |  |  | Strongly Agree |

1. The economic aspect conditions my clinical action

|  | 1 | 2 | 3 | 4 | 5 | 6 | 7 |  |
| --- | --- | --- | --- | --- | --- | --- | --- | --- |
| Strongly Disagree |  |  |  |  |  |  |  | Strongly Agree |

1. My work environment fosters practice according to evidence

|  | 1 | 2 | 3 | 4 | 5 | 6 | 7 |  |
| --- | --- | --- | --- | --- | --- | --- | --- | --- |
| Strongly Disagree |  |  |  |  |  |  |  | Strongly Agree |

1. I have taken courses and/or keep up to date with industry journals/journals/blogs etc. on research methodology

|  | 1 | 2 | 3 | 4 | 5 | 6 | 7 |  |
| --- | --- | --- | --- | --- | --- | --- | --- | --- |
| Strongly Disagree |  |  |  |  |  |  |  | Strongly Agree |

1. I think the physical therapist must acquire basic interdisciplinary skills (psychology, economics, and marketing) to be integrated into clinical practice

|  | 1 | 2 | 3 | 4 | 5 | 6 | 7 |  |
| --- | --- | --- | --- | --- | --- | --- | --- | --- |
| Strongly Disagree |  |  |  |  |  |  |  | Strongly Agree |
